# Supplementary material for: Novel variants in DNAH9 lead to nonsyndromic severe asthenozoospermia
Source: PubMed Central journal article supplement (PMC7896388; doi:10.1186/s12958-021-00709-0), 2021-02-20

**A****Family 1****M1=c.302dupT(p.L101fs\*47)****M2=c.6956A>G(p.D2319G)**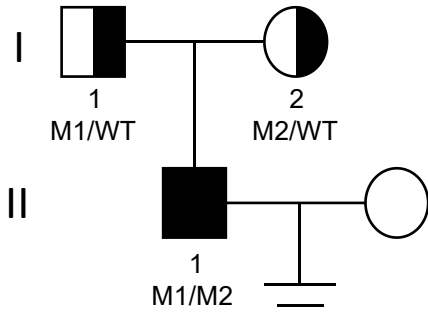**F1 II-1**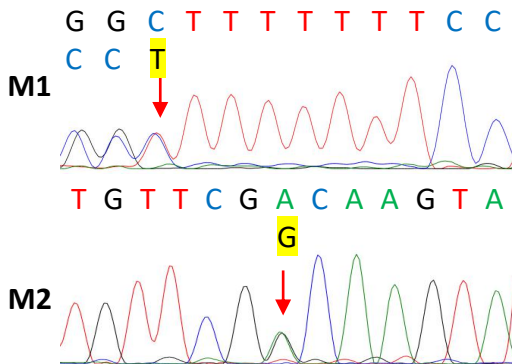**F1 I-1**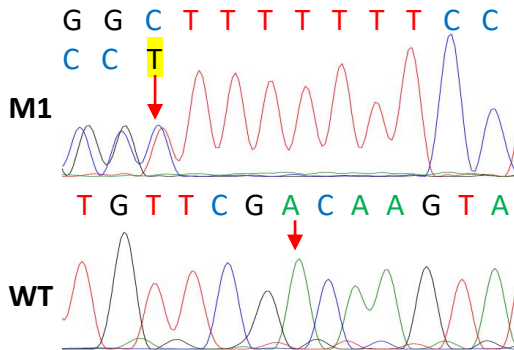**F1 I-2**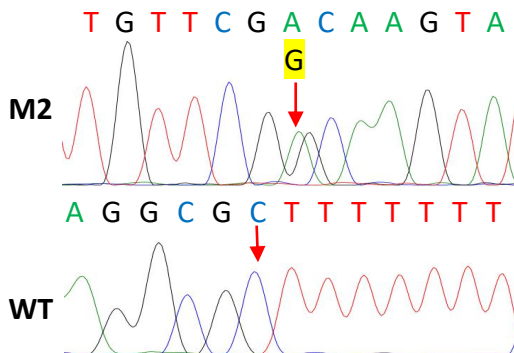**B****Family 2****M3=c.6294T>A(p.F2098L)****M4=c.10571T>A(p.L3524Q)**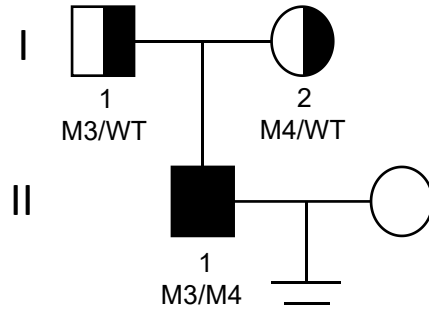**F2 II-1**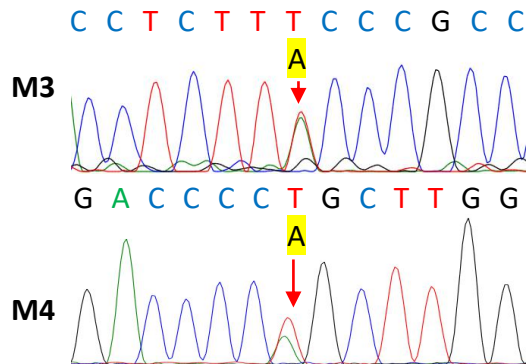**F2 I-1**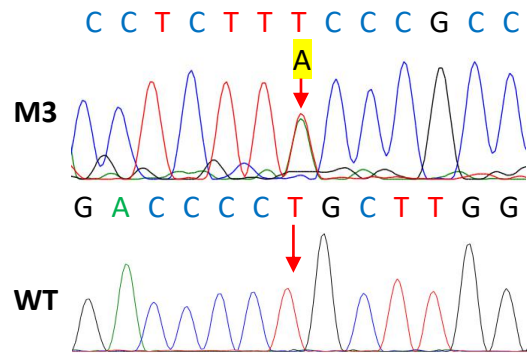**F2 I-2**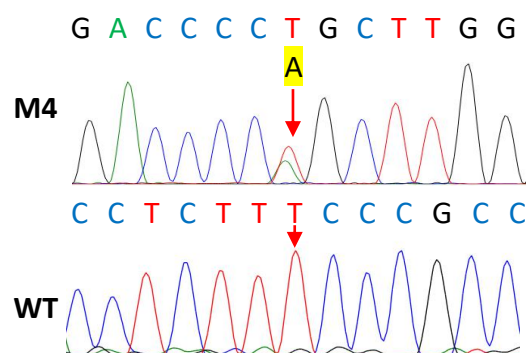

Supplement: 12958_2021_709_MOESM3_ESM.pdf [file 12958_2021_709_MOESM3_ESM.pdf]
