# Supplementary material for: Novel variants in DNAH9 lead to nonsyndromic severe asthenozoospermia
Source: PubMed Central journal article supplement (PMC7896388; doi:10.1186/s12958-021-00709-0), 2021-02-20

**Papanicolaou staining**

**Mid- piece**

**Principle piece**

**End piece**

**Control**

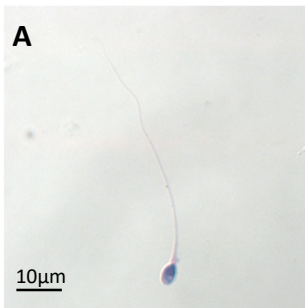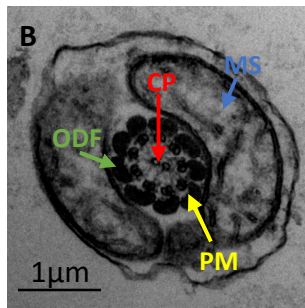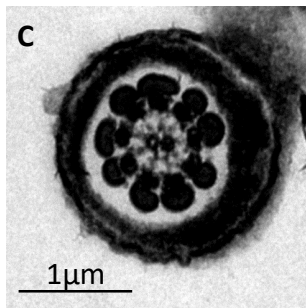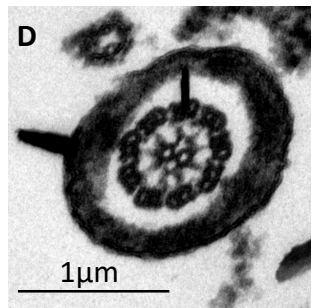

**F1 II-1**

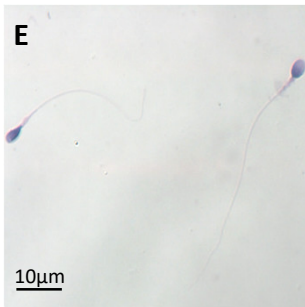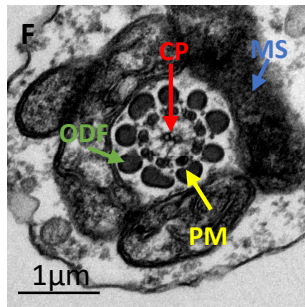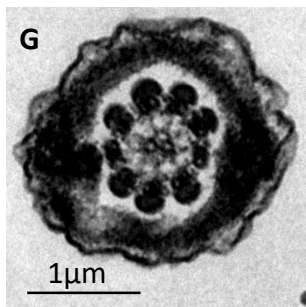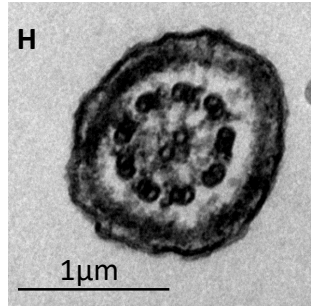

Supplement: 12958_2021_709_MOESM6_ESM.pdf [file 12958_2021_709_MOESM6_ESM.pdf]
